# Supplementary material
Source: MDPI journal article supplement (https://www.mdpi.com/1999-4907/13/11/1926)
Supplement: s1 [file s1]

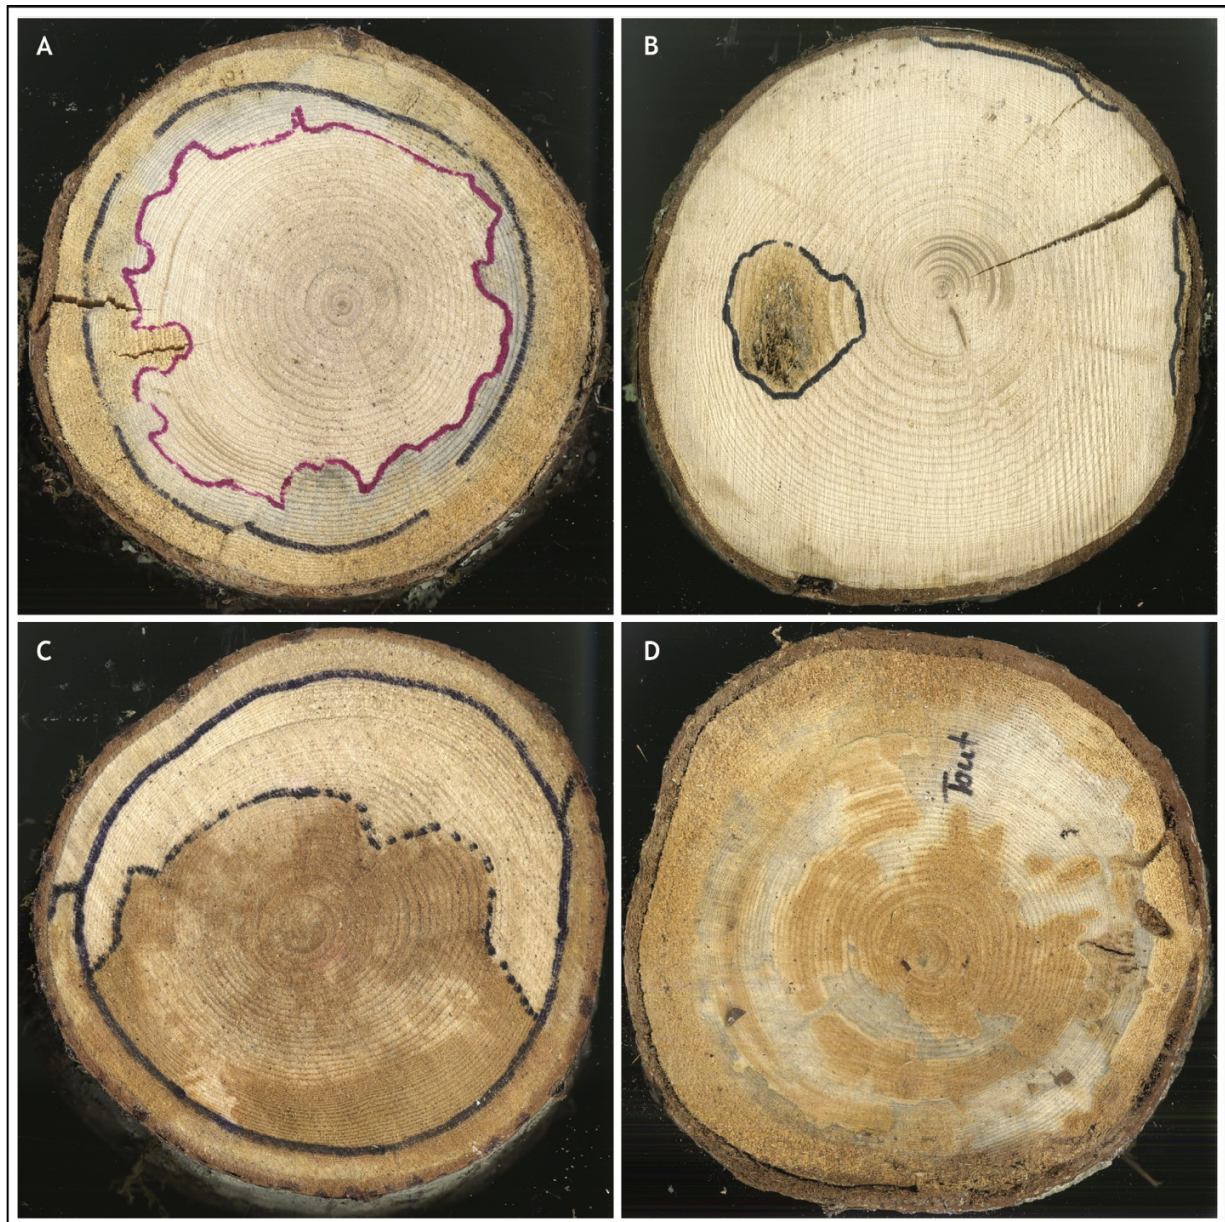

Figure S1. Decay and coloration in balsam fir (*Abies balsamea* (L.) Mill.) trunk wood. (A) Decay in sapwood and blue coloration in part of heartwood; (B) Small decayed area in heartwood; (C) Brown coloration in part of heartwood and sapwood; (D) Decay in all the sapwood area and in a large portion of heartwood, with blue coloration covering the rest of the surface.
